# Supplementary material for: Marine Robotics for Deep-Sea Specimen Collection: A Taxonomy of Underwater Manipulative Actions
Source: MDPI journal article supplement (doi:10.3390/s22041471), 2022-02-14
Supplement: s1 [file s1]

| Manipulative Actions |                  |                              |                                                       | Objects role                                 |                                                          |                                  |                                              | Semantic Event chain analysis and motion primitives                                                                                                                                                                                                                                                                                                                                                                                                                                                                                                                                    |               |      |      | Notes |        |         |  |  |        |           |  |  |        |              |  |  |        |           |  |  |  |
|----------------------|------------------|------------------------------|-------------------------------------------------------|----------------------------------------------|----------------------------------------------------------|----------------------------------|----------------------------------------------|----------------------------------------------------------------------------------------------------------------------------------------------------------------------------------------------------------------------------------------------------------------------------------------------------------------------------------------------------------------------------------------------------------------------------------------------------------------------------------------------------------------------------------------------------------------------------------------|---------------|------|------|-------|--------|---------|--|--|--------|-----------|--|--|--------|--------------|--|--|--------|-----------|--|--|--|
|                      | Manipulator      | Tool                         |                                                       | Main                                         | Primary                                                  | Main Support                     | Secondary                                    | Contact between                                                                                                                                                                                                                                                                                                                                                                                                                                                                                                                                                                        |               |      |      |       |        |         |  |  |        |           |  |  |        |              |  |  |        |           |  |  |  |
| 1.1                  | Push to break    | claw<br>claw<br>claw         | -<br>-<br>-                                           | organism<br>fragment<br>fragment             | substrate<br>organism<br>organism                        | water<br>water<br>water          | substrate<br>substrate<br>organism           | <table><tr><td>R Manipulator</td><td>Main</td><td></td><td></td></tr><tr><td>R Main</td><td>Primary</td><td></td><td></td></tr><tr><td>R Main</td><td>Secondary</td><td></td><td></td></tr><tr><td>R Main</td><td>Main Support</td><td></td><td></td></tr></table> <div>Manip -&gt; Moves(Main)<br/>Manip -&gt; Preshape<br/>Manip -&gt; ExertForce(Main)</div> <div>Manip -&gt; Moves(home)<br/>Main -&gt; Float(Main support)</div>                                                                                                                                                  | R Manipulator | Main |      |       | R Main | Primary |  |  | R Main | Secondary |  |  | R Main | Main Support |  |  |        |           |  |  |  |
| R Manipulator        | Main             |                              |                                                       |                                              |                                                          |                                  |                                              |                                                                                                                                                                                                                                                                                                                                                                                                                                                                                                                                                                                        |               |      |      |       |        |         |  |  |        |           |  |  |        |              |  |  |        |           |  |  |  |
| R Main               | Primary          |                              |                                                       |                                              |                                                          |                                  |                                              |                                                                                                                                                                                                                                                                                                                                                                                                                                                                                                                                                                                        |               |      |      |       |        |         |  |  |        |           |  |  |        |              |  |  |        |           |  |  |  |
| R Main               | Secondary        |                              |                                                       |                                              |                                                          |                                  |                                              |                                                                                                                                                                                                                                                                                                                                                                                                                                                                                                                                                                                        |               |      |      |       |        |         |  |  |        |           |  |  |        |              |  |  |        |           |  |  |  |
| R Main               | Main Support     |                              |                                                       |                                              |                                                          |                                  |                                              |                                                                                                                                                                                                                                                                                                                                                                                                                                                                                                                                                                                        |               |      |      |       |        |         |  |  |        |           |  |  |        |              |  |  |        |           |  |  |  |
| 2                    | Scrape           | claw<br>claw<br>claw         | -<br>-<br>-                                           | organism<br>fragment<br>fragment             | substrate<br>organism<br>organism                        | water<br>water<br>water          | substrate<br>substrate<br>organism           | <table><tr><td>R Manip</td><td>Main</td><td></td><td></td></tr><tr><td>R Main</td><td>Pri</td><td></td><td></td></tr><tr><td>R Main</td><td>Sec</td><td></td><td></td></tr><tr><td>R Main</td><td>M_support</td><td></td><td></td></tr></table> <div>Manip -&gt; Moves(Main)<br/>Manip -&gt; Preshape<br/>Manip -&gt; ExertForce(Main)<br/>Manip -&gt; Surfacefollowing(Primary)</div> <div>Manip -&gt; Moves(home)<br/>Main -&gt; Float(Main support)</div>                                                                                                                           | R Manip       | Main |      |       | R Main | Pri     |  |  | R Main | Sec       |  |  | R Main | M_support    |  |  |        |           |  |  |  |
| R Manip              | Main             |                              |                                                       |                                              |                                                          |                                  |                                              |                                                                                                                                                                                                                                                                                                                                                                                                                                                                                                                                                                                        |               |      |      |       |        |         |  |  |        |           |  |  |        |              |  |  |        |           |  |  |  |
| R Main               | Pri              |                              |                                                       |                                              |                                                          |                                  |                                              |                                                                                                                                                                                                                                                                                                                                                                                                                                                                                                                                                                                        |               |      |      |       |        |         |  |  |        |           |  |  |        |              |  |  |        |           |  |  |  |
| R Main               | Sec              |                              |                                                       |                                              |                                                          |                                  |                                              |                                                                                                                                                                                                                                                                                                                                                                                                                                                                                                                                                                                        |               |      |      |       |        |         |  |  |        |           |  |  |        |              |  |  |        |           |  |  |  |
| R Main               | M_support        |                              |                                                       |                                              |                                                          |                                  |                                              |                                                                                                                                                                                                                                                                                                                                                                                                                                                                                                                                                                                        |               |      |      |       |        |         |  |  |        |           |  |  |        |              |  |  |        |           |  |  |  |
| 2.A                  | Scrape with tool | claw<br>claw<br>claw<br>claw | suction sampler<br>suction sampler<br>scoop<br>basket | organism<br>fragment<br>organism<br>fragment | substrate<br>organism<br>substrate<br>organism           | water<br>water<br>water<br>water | substrate<br>organism<br>substrate<br>basket | <table><tr><td>R Manip</td><td>Tool</td><td>Main</td><td></td></tr><tr><td>R Tool</td><td>Main</td><td></td><td></td></tr><tr><td>R Main</td><td>Pri</td><td></td><td></td></tr><tr><td>R Main</td><td>Sec</td><td></td><td></td></tr><tr><td>R Main</td><td>M_support</td><td></td><td></td></tr></table> <div>Manip -&gt; Moves(Tool)<br/>Manip -&gt; Preshape<br/>Manip -&gt; Grasp(Tool)</div> <div>Manip -&gt; Moves(Main)<br/>Manip -&gt; ExertForce(Main)<br/>Manip -&gt; Surfacefollowing(Primary)</div> <div>Manip -&gt; Moves(home)<br/>Main -&gt; Float(Main support)</div> | R Manip       | Tool | Main |       | R Tool | Main    |  |  | R Main | Pri       |  |  | R Main | Sec          |  |  | R Main | M_support |  |  |  |
| R Manip              | Tool             | Main                         |                                                       |                                              |                                                          |                                  |                                              |                                                                                                                                                                                                                                                                                                                                                                                                                                                                                                                                                                                        |               |      |      |       |        |         |  |  |        |           |  |  |        |              |  |  |        |           |  |  |  |
| R Tool               | Main             |                              |                                                       |                                              |                                                          |                                  |                                              |                                                                                                                                                                                                                                                                                                                                                                                                                                                                                                                                                                                        |               |      |      |       |        |         |  |  |        |           |  |  |        |              |  |  |        |           |  |  |  |
| R Main               | Pri              |                              |                                                       |                                              |                                                          |                                  |                                              |                                                                                                                                                                                                                                                                                                                                                                                                                                                                                                                                                                                        |               |      |      |       |        |         |  |  |        |           |  |  |        |              |  |  |        |           |  |  |  |
| R Main               | Sec              |                              |                                                       |                                              |                                                          |                                  |                                              |                                                                                                                                                                                                                                                                                                                                                                                                                                                                                                                                                                                        |               |      |      |       |        |         |  |  |        |           |  |  |        |              |  |  |        |           |  |  |  |
| R Main               | M_support        |                              |                                                       |                                              |                                                          |                                  |                                              |                                                                                                                                                                                                                                                                                                                                                                                                                                                                                                                                                                                        |               |      |      |       |        |         |  |  |        |           |  |  |        |              |  |  |        |           |  |  |  |
| 3                    | Scoop            | Victor claw                  | -                                                     | organism and substrate                       | substrate                                                | water                            |                                              | <table><tr><td>R Manip</td><td>Main</td><td></td><td></td></tr><tr><td>R Main</td><td>Pri</td><td></td><td></td></tr><tr><td>R Main</td><td>Sec</td><td></td><td></td></tr><tr><td>R Main</td><td>M_support</td><td></td><td></td></tr></table> <div>Manip -&gt; Moves(Main)<br/>Manip -&gt; Preshape<br/>Manip -&gt; Exert force(Main, Primary)</div> <div>Manip -&gt; Turn<br/>Manip -&gt; Pull(home)</div>                                                                                                                                                                          | R Manip       | Main |      |       | R Main | Pri     |  |  | R Main | Sec       |  |  | R Main | M_support    |  |  |        |           |  |  |  |
| R Manip              | Main             |                              |                                                       |                                              |                                                          |                                  |                                              |                                                                                                                                                                                                                                                                                                                                                                                                                                                                                                                                                                                        |               |      |      |       |        |         |  |  |        |           |  |  |        |              |  |  |        |           |  |  |  |
| R Main               | Pri              |                              |                                                       |                                              |                                                          |                                  |                                              |                                                                                                                                                                                                                                                                                                                                                                                                                                                                                                                                                                                        |               |      |      |       |        |         |  |  |        |           |  |  |        |              |  |  |        |           |  |  |  |
| R Main               | Sec              |                              |                                                       |                                              |                                                          |                                  |                                              |                                                                                                                                                                                                                                                                                                                                                                                                                                                                                                                                                                                        |               |      |      |       |        |         |  |  |        |           |  |  |        |              |  |  |        |           |  |  |  |
| R Main               | M_support        |                              |                                                       |                                              |                                                          |                                  |                                              |                                                                                                                                                                                                                                                                                                                                                                                                                                                                                                                                                                                        |               |      |      |       |        |         |  |  |        |           |  |  |        |              |  |  |        |           |  |  |  |
| 3.A.1                | Scoop with tool  | claw                         | scoop                                                 | organism, substrate                          | substrate                                                | water                            |                                              | <table><tr><td>R Manip</td><td>Tool</td><td>Main</td><td></td></tr><tr><td>R Tool</td><td>Main</td><td></td><td></td></tr><tr><td>R Main</td><td>Pri</td><td></td><td></td></tr><tr><td>R Main</td><td>Sec</td><td></td><td></td></tr><tr><td>R Main</td><td>M_support</td><td></td><td></td></tr></table> <div>Manip -&gt; Moves(Tool)<br/>Manip -&gt; Preshape<br/>Manip -&gt; Grasp(Tool)</div> <div>Manip -&gt; Moves(Main)<br/>Manip -&gt; Preshape<br/>Manip -&gt; Exert force (Main, Primary)</div> <div>Manip -&gt; Turn<br/>Manip -&gt; Pull(home)</div>                      | R Manip       | Tool | Main |       | R Tool | Main    |  |  | R Main | Pri       |  |  | R Main | Sec          |  |  | R Main | M_support |  |  |  |
| R Manip              | Tool             | Main                         |                                                       |                                              |                                                          |                                  |                                              |                                                                                                                                                                                                                                                                                                                                                                                                                                                                                                                                                                                        |               |      |      |       |        |         |  |  |        |           |  |  |        |              |  |  |        |           |  |  |  |
| R Tool               | Main             |                              |                                                       |                                              |                                                          |                                  |                                              |                                                                                                                                                                                                                                                                                                                                                                                                                                                                                                                                                                                        |               |      |      |       |        |         |  |  |        |           |  |  |        |              |  |  |        |           |  |  |  |
| R Main               | Pri              |                              |                                                       |                                              |                                                          |                                  |                                              |                                                                                                                                                                                                                                                                                                                                                                                                                                                                                                                                                                                        |               |      |      |       |        |         |  |  |        |           |  |  |        |              |  |  |        |           |  |  |  |
| R Main               | Sec              |                              |                                                       |                                              |                                                          |                                  |                                              |                                                                                                                                                                                                                                                                                                                                                                                                                                                                                                                                                                                        |               |      |      |       |        |         |  |  |        |           |  |  |        |              |  |  |        |           |  |  |  |
| R Main               | M_support        |                              |                                                       |                                              |                                                          |                                  |                                              |                                                                                                                                                                                                                                                                                                                                                                                                                                                                                                                                                                                        |               |      |      |       |        |         |  |  |        |           |  |  |        |              |  |  |        |           |  |  |  |
| 3.A.1                | Scoop with tool  | claw                         | scoop net                                             | organism, substrate                          | substrate                                                | water                            | scoop net                                    | <table><tr><td>R Manip</td><td>Tool</td><td>Main</td><td></td></tr><tr><td>R Tool</td><td>Main</td><td></td><td></td></tr><tr><td>R Main</td><td>Pri</td><td></td><td></td></tr><tr><td>R Main</td><td>Sec</td><td></td><td></td></tr><tr><td>R Main</td><td>M_support</td><td></td><td></td></tr></table> <div>Manip -&gt; Moves(Tool)<br/>Manip -&gt; Preshape<br/>Manip -&gt; Grasp(Tool)</div> <div>Manip -&gt; Moves(Main)<br/>Manip -&gt; Preshape<br/>Manip -&gt; Exert force (Main, Primary)</div> <div>Manip -&gt; Turn<br/>Manip -&gt; Pull(home)</div>                      | R Manip       | Tool | Main |       | R Tool | Main    |  |  | R Main | Pri       |  |  | R Main | Sec          |  |  | R Main | M_support |  |  |  |
| R Manip              | Tool             | Main                         |                                                       |                                              |                                                          |                                  |                                              |                                                                                                                                                                                                                                                                                                                                                                                                                                                                                                                                                                                        |               |      |      |       |        |         |  |  |        |           |  |  |        |              |  |  |        |           |  |  |  |
| R Tool               | Main             |                              |                                                       |                                              |                                                          |                                  |                                              |                                                                                                                                                                                                                                                                                                                                                                                                                                                                                                                                                                                        |               |      |      |       |        |         |  |  |        |           |  |  |        |              |  |  |        |           |  |  |  |
| R Main               | Pri              |                              |                                                       |                                              |                                                          |                                  |                                              |                                                                                                                                                                                                                                                                                                                                                                                                                                                                                                                                                                                        |               |      |      |       |        |         |  |  |        |           |  |  |        |              |  |  |        |           |  |  |  |
| R Main               | Sec              |                              |                                                       |                                              |                                                          |                                  |                                              |                                                                                                                                                                                                                                                                                                                                                                                                                                                                                                                                                                                        |               |      |      |       |        |         |  |  |        |           |  |  |        |              |  |  |        |           |  |  |  |
| R Main               | M_support        |                              |                                                       |                                              |                                                          |                                  |                                              |                                                                                                                                                                                                                                                                                                                                                                                                                                                                                                                                                                                        |               |      |      |       |        |         |  |  |        |           |  |  |        |              |  |  |        |           |  |  |  |
| 4.A                  | Core with corer  | claw                         | corer                                                 | organism, substrate                          | substrate                                                | water                            | corer                                        | <table><tr><td>R Manip</td><td>Tool</td><td>Main</td><td></td></tr><tr><td>R Tool</td><td>Main</td><td></td><td></td></tr><tr><td>R Main</td><td>Pri</td><td></td><td></td></tr><tr><td>R Main</td><td>Sec</td><td></td><td></td></tr><tr><td>R Main</td><td>M_support</td><td></td><td></td></tr></table> <div>Manip -&gt; Moves(Tool)<br/>Manip -&gt; Preshape<br/>Manip -&gt; Grasp(Tool)</div> <div>Manip -&gt; Moves(Main)<br/>Manip -&gt; Preshape<br/>Manip -&gt; Exert force (Main, Primary)</div> <div>Manip -&gt; Pull(home)</div>                                           | R Manip       | Tool | Main |       | R Tool | Main    |  |  | R Main | Pri       |  |  | R Main | Sec          |  |  | R Main | M_support |  |  |  |
| R Manip              | Tool             | Main                         |                                                       |                                              |                                                          |                                  |                                              |                                                                                                                                                                                                                                                                                                                                                                                                                                                                                                                                                                                        |               |      |      |       |        |         |  |  |        |           |  |  |        |              |  |  |        |           |  |  |  |
| R Tool               | Main             |                              |                                                       |                                              |                                                          |                                  |                                              |                                                                                                                                                                                                                                                                                                                                                                                                                                                                                                                                                                                        |               |      |      |       |        |         |  |  |        |           |  |  |        |              |  |  |        |           |  |  |  |
| R Main               | Pri              |                              |                                                       |                                              |                                                          |                                  |                                              |                                                                                                                                                                                                                                                                                                                                                                                                                                                                                                                                                                                        |               |      |      |       |        |         |  |  |        |           |  |  |        |              |  |  |        |           |  |  |  |
| R Main               | Sec              |                              |                                                       |                                              |                                                          |                                  |                                              |                                                                                                                                                                                                                                                                                                                                                                                                                                                                                                                                                                                        |               |      |      |       |        |         |  |  |        |           |  |  |        |              |  |  |        |           |  |  |  |
| R Main               | M_support        |                              |                                                       |                                              |                                                          |                                  |                                              |                                                                                                                                                                                                                                                                                                                                                                                                                                                                                                                                                                                        |               |      |      |       |        |         |  |  |        |           |  |  |        |              |  |  |        |           |  |  |  |
| 5                    | Grip             | claw<br>claw                 | -<br>-                                                | organism<br>fragment                         | substrate, water, organism<br>substrate, water, organism | water<br>water                   |                                              | <table><tr><td>R Manip</td><td>Main</td><td></td><td></td></tr><tr><td>R Main</td><td>Pri</td><td></td><td></td></tr><tr><td>R Main</td><td>Sec</td><td></td><td></td></tr><tr><td>R Main</td><td>M_support</td><td></td><td></td></tr></table> <div>Manip -&gt; Moves(Main)<br/>Manip -&gt; Preshape<br/>Manip -&gt; Grasp (Main)</div> <div>Manip -&gt; Moves(home)</div>                                                                                                                                                                                                            | R Manip       | Main |      |       | R Main | Pri     |  |  | R Main | Sec       |  |  | R Main | M_support    |  |  |        |           |  |  |  |
| R Manip              | Main             |                              |                                                       |                                              |                                                          |                                  |                                              |                                                                                                                                                                                                                                                                                                                                                                                                                                                                                                                                                                                        |               |      |      |       |        |         |  |  |        |           |  |  |        |              |  |  |        |           |  |  |  |
| R Main               | Pri              |                              |                                                       |                                              |                                                          |                                  |                                              |                                                                                                                                                                                                                                                                                                                                                                                                                                                                                                                                                                                        |               |      |      |       |        |         |  |  |        |           |  |  |        |              |  |  |        |           |  |  |  |
| R Main               | Sec              |                              |                                                       |                                              |                                                          |                                  |                                              |                                                                                                                                                                                                                                                                                                                                                                                                                                                                                                                                                                                        |               |      |      |       |        |         |  |  |        |           |  |  |        |              |  |  |        |           |  |  |  |
| R Main               | M_support        |                              |                                                       |                                              |                                                          |                                  |                                              |                                                                                                                                                                                                                                                                                                                                                                                                                                                                                                                                                                                        |               |      |      |       |        |         |  |  |        |           |  |  |        |              |  |  |        |           |  |  |  |
| 5.1                  | Grip and twist   | claw                         | -                                                     | organism                                     | substrate                                                | water                            |                                              | <table><tr><td>R Manip</td><td>Main</td><td></td><td></td></tr><tr><td>R Main</td><td>Pri</td><td></td><td></td></tr><tr><td>R Main</td><td>Sec</td><td></td><td></td></tr><tr><td>R Main</td><td>M_support</td><td></td><td></td></tr></table> <div>Manip -&gt; Moves(Main)<br/>Manip -&gt; Preshape<br/>Manip -&gt; Grasp (Main)</div> <div>Manip -&gt; Twist</div>                                                                                                                                                                                                                  | R Manip       | Main |      |       | R Main | Pri     |  |  | R Main | Sec       |  |  | R Main | M_support    |  |  |        |           |  |  |  |
| R Manip              | Main             |                              |                                                       |                                              |                                                          |                                  |                                              |                                                                                                                                                                                                                                                                                                                                                                                                                                                                                                                                                                                        |               |      |      |       |        |         |  |  |        |           |  |  |        |              |  |  |        |           |  |  |  |
| R Main               | Pri              |                              |                                                       |                                              |                                                          |                                  |                                              |                                                                                                                                                                                                                                                                                                                                                                                                                                                                                                                                                                                        |               |      |      |       |        |         |  |  |        |           |  |  |        |              |  |  |        |           |  |  |  |
| R Main               | Sec              |                              |                                                       |                                              |                                                          |                                  |                                              |                                                                                                                                                                                                                                                                                                                                                                                                                                                                                                                                                                                        |               |      |      |       |        |         |  |  |        |           |  |  |        |              |  |  |        |           |  |  |  |
| R Main               | M_support        |                              |                                                       |                                              |                                                          |                                  |                                              |                                                                                                                                                                                                                                                                                                                                                                                                                                                                                                                                                                                        |               |      |      |       |        |         |  |  |        |           |  |  |        |              |  |  |        |           |  |  |  |
| 5.2                  | Grip and pull    | claw                         | -                                                     | organism                                     | substrate                                                | water                            |                                              | <table><tr><td>R Manip</td><td>Main</td><td></td><td></td></tr><tr><td>R Main</td><td>Pri</td><td></td><td></td></tr><tr><td>R Main</td><td>Sec</td><td></td><td></td></tr><tr><td>R Main</td><td>M_support</td><td></td><td></td></tr></table> <div>Manip -&gt; Moves(Main)<br/>Manip -&gt; Preshape<br/>Manip -&gt; Grasp (Main)</div> <div>Manip -&gt; Pull(home)</div>                                                                                                                                                                                                             | R Manip       | Main |      |       | R Main | Pri     |  |  | R Main | Sec       |  |  | R Main | M_support    |  |  |        |           |  |  |  |
| R Manip              | Main             |                              |                                                       |                                              |                                                          |                                  |                                              |                                                                                                                                                                                                                                                                                                                                                                                                                                                                                                                                                                                        |               |      |      |       |        |         |  |  |        |           |  |  |        |              |  |  |        |           |  |  |  |
| R Main               | Pri              |                              |                                                       |                                              |                                                          |                                  |                                              |                                                                                                                                                                                                                                                                                                                                                                                                                                                                                                                                                                                        |               |      |      |       |        |         |  |  |        |           |  |  |        |              |  |  |        |           |  |  |  |
| R Main               | Sec              |                              |                                                       |                                              |                                                          |                                  |                                              |                                                                                                                                                                                                                                                                                                                                                                                                                                                                                                                                                                                        |               |      |      |       |        |         |  |  |        |           |  |  |        |              |  |  |        |           |  |  |  |
| R Main               | M_support        |                              |                                                       |                                              |                                                          |                                  |                                              |                                                                                                                                                                                                                                                                                                                                                                                                                                                                                                                                                                                        |               |      |      |       |        |         |  |  |        |           |  |  |        |              |  |  |        |           |  |  |  |
| 5.B                  | Grip tool        | claw                         | -                                                     | trap                                         | substrate                                                | water                            |                                              | <table><tr><td>R Manip</td><td>Main</td><td></td><td></td></tr><tr><td>R Main</td><td>Pri</td><td></td><td></td></tr><tr><td>R Main</td><td>Sec</td><td></td><td></td></tr><tr><td>R Main</td><td>M_support</td><td></td><td></td></tr></table> <div>Manip -&gt; Moves(Main)<br/>Manip -&gt; Preshape<br/>Manip -&gt; Grasp (Main)</div> <div>Manip -&gt; Moves(home)</div>                                                                                                                                                                                                            | R Manip       | Main |      |       | R Main | Pri     |  |  | R Main | Sec       |  |  | R Main | M_support    |  |  |        |           |  |  |  |
| R Manip              | Main             |                              |                                                       |                                              |                                                          |                                  |                                              |                                                                                                                                                                                                                                                                                                                                                                                                                                                                                                                                                                                        |               |      |      |       |        |         |  |  |        |           |  |  |        |              |  |  |        |           |  |  |  |
| R Main               | Pri              |                              |                                                       |                                              |                                                          |                                  |                                              |                                                                                                                                                                                                                                                                                                                                                                                                                                                                                                                                                                                        |               |      |      |       |        |         |  |  |        |           |  |  |        |              |  |  |        |           |  |  |  |
| R Main               | Sec              |                              |                                                       |                                              |                                                          |                                  |                                              |                                                                                                                                                                                                                                                                                                                                                                                                                                                                                                                                                                                        |               |      |      |       |        |         |  |  |        |           |  |  |        |              |  |  |        |           |  |  |  |
| R Main               | M_support        |                              |                                                       |                                              |                                                          |                                  |                                              |                                                                                                                                                                                                                                                                                                                                                                                                                                                                                                                                                                                        |               |      |      |       |        |         |  |  |        |           |  |  |        |              |  |  |        |           |  |  |  |
| 6                    | Cage             | Liropus claw<br>Victor claw  | -<br>-                                                | organism, substrate<br>organism, substrate   | substrate<br>substrate                                   | water<br>water                   |                                              | <table><tr><td>R Manip</td><td>Main</td><td></td><td></td></tr><tr><td>R Main</td><td>Pri</td><td></td><td></td></tr><tr><td>R Main</td><td>Sec</td><td></td><td></td></tr><tr><td>R Main</td><td>M_support</td><td></td><td></td></tr></table> <div>Manip -&gt; Moves(Main)<br/>Manip -&gt; Preshape<br/>Manip -&gt; Envelop (Main)</div> <div>Manip -&gt; Pull(home)</div>                                                                                                                                                                                                           | R Manip       | Main |      |       | R Main | Pri     |  |  | R Main | Sec       |  |  | R Main | M_support    |  |  |        |           |  |  |  |
| R Manip              | Main             |                              |                                                       |                                              |                                                          |                                  |                                              |                                                                                                                                                                                                                                                                                                                                                                                                                                                                                                                                                                                        |               |      |      |       |        |         |  |  |        |           |  |  |        |              |  |  |        |           |  |  |  |
| R Main               | Pri              |                              |                                                       |                                              |                                                          |                                  |                                              |                                                                                                                                                                                                                                                                                                                                                                                                                                                                                                                                                                                        |               |      |      |       |        |         |  |  |        |           |  |  |        |              |  |  |        |           |  |  |  |
| R Main               | Sec              |                              |                                                       |                                              |                                                          |                                  |                                              |                                                                                                                                                                                                                                                                                                                                                                                                                                                                                                                                                                                        |               |      |      |       |        |         |  |  |        |           |  |  |        |              |  |  |        |           |  |  |  |
| R Main               | M_support        |                              |                                                       |                                              |                                                          |                                  |                                              |                                                                                                                                                                                                                                                                                                                                                                                                                                                                                                                                                                                        |               |      |      |       |        |         |  |  |        |           |  |  |        |              |  |  |        |           |  |  |  |

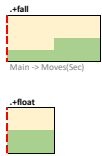

| Task                    | Tool                        | Object                                                   | Material                                   | Environment                                              | Robot Configuration | Action Sequence                                                                                                                                                                                              |
|-------------------------|-----------------------------|----------------------------------------------------------|--------------------------------------------|----------------------------------------------------------|---------------------|--------------------------------------------------------------------------------------------------------------------------------------------------------------------------------------------------------------|
| 6.1 Cage and pull       | Liropus claw<br>Victor claw | -<br>-                                                   | organism, substrate<br>organism, substrate | substrate<br>substrate                                   | water<br>water      | <p>R Manip Main<br/>R Main Pri<br/>R Main Sec<br/>R Main M_support</p> <p>Manip -&gt; Moves(Main)<br/>Manip -&gt; Pull(home)</p>                                                                             |
| 7.A Suction on with SS  | claw<br>claw                | suction sampler with sieve<br>suction sampler with sieve | organism<br>fragment                       | substrate, water, organism<br>substrate, water, organism | water<br>water      | <p>R Manip Tool<br/>R Tool Main<br/>R Main Pri<br/>R Main Sec<br/>R Main M_support</p> <p>Manip -&gt; Preshape<br/>Manip -&gt; Envelop(Main)<br/>Manip -&gt; Moves(Main)<br/>Manip -&gt; Turn on suction</p> |
| 8.A Suction and store   | claw<br>claw                | suction sampler<br>suction sampler                       | organism<br>fragment                       | substrate, water, organism<br>substrate, water, organism | water<br>jar        | <p>R Manip Tool<br/>R Tool Main<br/>R Main Pri<br/>R Main Sec<br/>R Main M_support</p> <p>Manip -&gt; Moves(Main)<br/>Manip -&gt; Turn on suction<br/>Manip -&gt; Moves(jar)</p>                             |
| 9.A Suction off with SS |                             |                                                          |                                            |                                                          |                     | <p>R Manip Tool<br/>R Tool Main<br/>R Main Pri<br/>R Main Sec<br/>R Main M_support</p> <p>Manip -&gt; Moves(Secondary)<br/>Manip -&gt; Turn off suction<br/>Main -&gt; Float(Main support)</p>               |
| 10 Release              |                             |                                                          |                                            |                                                          |                     | <p>R Manip Main<br/>R Main Pri<br/>R Main Sec<br/>R Main M_support</p> <p>Manip -&gt; Moves(Sec)<br/>Manip -&gt; Release<br/>Main -&gt; Float(Main support)</p>                                              |
| 10.B Release tool       | claw<br>claw                | -<br>-                                                   | scoop net<br>corer                         | claw<br>claw                                             | water<br>water      | <p>R Manip Main<br/>R Main Pri<br/>R Main Sec<br/>R Main M_support</p> <p>Manip -&gt; Moves(Secondary)<br/>Manip -&gt; Insert(Secondary)<br/>Manip -&gt; Release<br/>Main -&gt; Fall(Secondary)</p>          |
| 11 Pour                 |                             |                                                          |                                            |                                                          |                     | <p>R Manip Main<br/>R Main Pri<br/>R Main Sec<br/>R Main M_support</p> <p>Manip -&gt; Moves(Secondary)<br/>Manip -&gt; Turn<br/>Main -&gt; Fall(Secondary)</p>                                               |
| 11.A Pour with tool     |                             |                                                          |                                            |                                                          |                     | <p>R Manip Tool<br/>R Tool Main<br/>R Main Pri<br/>R Main Sec<br/>R Main M_support</p> <p>Manip -&gt; Moves(Sec)<br/>Manip -&gt; Turn<br/>Main -&gt; Fall(Secondary)</p>                                     |
| 12 Scissor Cut          |                             |                                                          |                                            |                                                          |                     |                                                                                                                                                                                                              |
| 11 Hook                 |                             |                                                          |                                            |                                                          |                     |                                                                                                                                                                                                              |
| 12 Lever                |                             |                                                          |                                            |                                                          |                     |                                                                                                                                                                                                              |
