# Supplementary material for: Marine Robotics for Deep-Sea Specimen Collection: A Taxonomy of Underwater Manipulative Actions
Source: MDPI journal article supplement (doi:10.3390/s22041471), 2022-02-14
Supplement: s1 [file s1]

Cnidarians

| i.e.                         | Condition                                                                                                                             | Detach                                                         |                 | Pick and place |                 | Store        |                  |
|------------------------------|---------------------------------------------------------------------------------------------------------------------------------------|----------------------------------------------------------------|-----------------|----------------|-----------------|--------------|------------------|
| Scleractinia<br>Antipatharia | SHAPE: Arborescent<br>CONS&DEF: Rigid and brittle<br>SAMPLE: small tissue/fragment                                                    | Push until breaking the fragment                               | claw            | Grip           | claw            | Release      | biobox           |
|                              |                                                                                                                                       | Push until breaking the fragment                               | claw            | Suction        | suction sampler | Suction off  | biobox           |
|                              |                                                                                                                                       | Scrape                                                         | basket          | Collect        | basket          | Hold         | basket           |
| Antipatharia                 | SHAPE: Arborescent<br>CONS&DEF: Rigid skeleton and wiry elastic tissue (that makes difficult to take fragments)<br>SAMPLE: whole tree | Grip the base and pull                                         | claw            | Hold           | claw            | Release      | biobox<br>drawer |
|                              |                                                                                                                                       | Push until breaking the host                                   | claw            | Grip           | claw            | Release      | biobox<br>drawer |
|                              |                                                                                                                                       |                                                                |                 |                |                 |              |                  |
| Actinaria                    | SHAPE: Polyp, Big<br>CONS&DEF: soft to medium                                                                                         | Grip and pull                                                  | claw            | Hold           | claw            | Release      | biobox           |
|                              | SHAPE: Polyp, Small<br>CONS&DEF: soft to medium                                                                                       | Scrape                                                         | suction sampler | Suction        | suction sampler | Suction off  | biobox           |
| Zoantharia                   | SHAPE: Encrusting<br>CONS&DEF: soft to medium<br>SAMPLE: whole organism                                                               | See collection of its host (rocks, gorgonians, antipatharians) |                 |                |                 |              |                  |
|                              | SHAPE: Encrusting<br>CONS&DEF: soft to medium<br>SAMPLE: fragment                                                                     | Scrape                                                         | suction sampler | Suction        | suction sampler | Suction off  | biobox           |
|                              |                                                                                                                                       | Push until breaking the fragment/ the host                     | claw            | Suction        | suction sampler | Suction tube | jar              |

| i.e.                                               | Condition                                                                                                               | Detach                                                                     |        | Pick and place |                 | Store       |        |
|----------------------------------------------------|-------------------------------------------------------------------------------------------------------------------------|----------------------------------------------------------------------------|--------|----------------|-----------------|-------------|--------|
| Alcyonacea                                         | DESIRED SAMPLE: Whole<br>SUBSTRATE: rigid<br>CONS&DEF: soft, elastic tissues, breakable skeleton                        | Push the base of the tree (close to the substrate) until breaking the base | claw   | Grip           | claw            | Release     | biobox |
|                                                    |                                                                                                                         |                                                                            |        |                |                 |             | drawer |
| Alcyonacea                                         | DESIRED SAMPLE: whole<br>SUBSTRATE: friable<br>CONS&DEF: soft, elastic tissues, breakable skeleton                      | Grip the base and pull                                                     | claw   | Hold           | claw            | Release     | biobox |
| <i>Acanella</i><br><i>Chrysogorgia</i>             | DESIRED SAMPLE: whole<br>SUBSTRATE: rigid<br>CONS&DEF: rigid, brittle                                                   | Grip the base and pull                                                     | claw   | Hold           | claw            | Release     | biobox |
|                                                    |                                                                                                                         |                                                                            |        |                |                 |             |        |
| Alcyonacea (gorgonians)<br>other Octocorallia spp. | DESIRED SAMPLE: fragment<br>SUBSTRATE: rigid<br>CONS&DEF: medium, Plastic (tissue tearing, skeleton) or brittle         | Grip, twist and break                                                      | claw   | Hold           | claw            | Release     | biobox |
|                                                    |                                                                                                                         | Grip, twist and break                                                      | claw   | Suction        | suction sampler | Suction off | biobox |
| Alcyonacea (gorgonians/sea whips)                  | DESIRED SAMPLE: whole<br>SUBSTRATE: rigid<br>CONS&DEF: soft to medium, Plastic (tissue tearing)                         | Grip and pull                                                              | claw   | Suction        | suction sampler | Suction off | biobox |
| Alcyonacea (gorgonians)                            | DESIRED SAMPLE: fragment<br>SUBSTRATE: rigid<br>CONS&DEF: medium, brittle<br>ANALYSIS: intact tissue, without abrasions | Scrape                                                                     | basket | Collect        | basket          | Hold        | basket |
| Pennatulacea                                       | DESIRED SAMPLE: whole<br>SUBSTRATE: friable                                                                             | Grip peduncle (not the leaves/polyps) and pull                             | claw   | Hold           | claw            | Release     | biobox |
|                                                    |                                                                                                                         | Grip peduncle (not the leaves/polyps) and pull                             | claw   | Suction        | suction sampler | Suction off | biobox |

| i.e.         | Condition                   | Detach                                                 |      | Pick and place |                 | Store   |        |
|--------------|-----------------------------|--------------------------------------------------------|------|----------------|-----------------|---------|--------|
| Ceriantharia | SAMPLE: whole               | Insert jaws in the sediment, Grip and pull             | claw | Suction        | suction sampler | Suction | jar    |
| Hydrocorals  | SAMPLE: whole               | Grip and pull                                          | claw | Hold           | claw            | Release | biobox |
| Anthozoa     | SAMPLE: with host, fragment | See host sampling (break the rock) or break a fragment |      |                |                 |         |        |

Arthropods

| i.e.                                | Condition                                                            | Detach                                  |       | Pick and place |                 | Store         |        |
|-------------------------------------|----------------------------------------------------------------------|-----------------------------------------|-------|----------------|-----------------|---------------|--------|
| Chitonophilidae<br>Copepoda         | DIMENSION: <1mm                                                      | See collection of its host (gastropods) |       |                |                 |               |        |
| Copepoda<br>Ostracoda<br>Amphipoda  | DIMENSION: 0.1 : 1 cm                                                | ---                                     | ---   | Suction        | suction sampler | Suction off   | biobox |
| Pycnogonida                         | DIMENSION: 2 : 3 cm<br>BEHAVIOR: crawler                             | Insert                                  | corer | Pull           | corer           | Release corer | corer  |
| Sessilia<br>Lepadiformes            | DIMENSION: 1cm : 7 cm<br>SHAPE: Encrusting                           | Grip and pull                           | claw  | Hold           | claw            | Release       | biobox |
| Shrimps<br>Crabs<br>other Crustacea | DIMENSION: around 5-10 cm, occasionally bigger<br>LIFESTYLE: swimmer | ---                                     | ---   | Grip           | claw            | Release       | biobox |
|                                     |                                                                      | ---                                     | ---   | Suction        | suction sampler | Suction tube  | jar    |

|                                              |                   |     |     |               |      |                  |      |
|----------------------------------------------|-------------------|-----|-----|---------------|------|------------------|------|
| Amphipoda<br>Decapoda (shrimps)<br>Ostracoda | DIMENSION: > 5 cm | --- | --- | Grip the trap | trap | Release the trap | trap |
|----------------------------------------------|-------------------|-----|-----|---------------|------|------------------|------|

### Mollusks

| i.e.                                 | Condition                                                                     | Detach                                  |                         | Pick and place |                 | Store            |        |
|--------------------------------------|-------------------------------------------------------------------------------|-----------------------------------------|-------------------------|----------------|-----------------|------------------|--------|
| Scaphopoda<br>Bivalvia<br>Gastropoda | CONS&DEF: Medium to Rigid<br>BEHAV: Buried, attached, crawling, respectively. | Scraping                                | claw (victor)           | Scooping       | claw (victor)   | Release          | biobox |
|                                      |                                                                               |                                         | scoop                   |                | scoop           |                  |        |
|                                      |                                                                               | Scraping                                | claw<br>suction sampler | Suction        | suction sampler | Suction tube     | jar    |
|                                      |                                                                               | Grip carefully and pull                 | claw                    | Hold           | claw            | Release          | biobox |
| Aplacophora                          | CONS&DEF: Soft                                                                | Scraping                                | claw (victor)           | Scooping       | claw (victor)   | Release          | biobox |
|                                      |                                                                               |                                         | scoop                   |                | scoop           |                  |        |
|                                      |                                                                               | Scraping                                | claw<br>suction sampler | Suction        | suction sampler | Suction tube     | jar    |
| Gastropoda                           | Parasitic                                                                     | See collection of its host (gorgonians) |                         |                |                 |                  |        |
| Gastropoda<br>Aplacophora            | ENV: on soft sediment                                                         | Insert                                  | corer                   | Pull           | corer           | Release corer    | corer  |
| Cephalopoda                          | CONS&DEF: Soft                                                                | ---                                     | ---                     | Grip           | claw            | Release          | biobox |
| Bivalvia<br>Aplacophora              |                                                                               | ---                                     | ---                     | Grip the trap  | trap            | Release the trap | trap   |

### Echinoderms

| i.e.                      | Condition                                                                         | Detach                                  |                                 | Pick and place                          |                                 | Store        |        |
|---------------------------|-----------------------------------------------------------------------------------|-----------------------------------------|---------------------------------|-----------------------------------------|---------------------------------|--------------|--------|
| Echinoidea                | Rigid and brittle, with spines                                                    | Grip                                    | claw (generic, victor, liropus) | Hold                                    | claw (generic, victor, liropus) | Release      | biobox |
|                           |                                                                                   | Scoop, eventually with some environment | scoop                           | Hold                                    | scoop                           | Pour         | drawer |
| Asteroidea<br>Ophiuroidea | Medium                                                                            | Grip                                    | claw (generic, victor)          | Hold                                    | claw (generic, victor)          | Release      | biobox |
|                           |                                                                                   | Scoop, eventually with some environment | scoop                           | Hold                                    | scoop                           | Pour         | drawer |
| Holothuroidea             | Soft to medium                                                                    | ---                                     | ---                             | Grip                                    | claw                            | Release      | biobox |
|                           |                                                                                   | ---                                     | ---                             | Scoop, eventually with some environment | scoop                           | Pour         | drawer |
|                           |                                                                                   | ---                                     | ---                             | Suction                                 | suction sampler                 | Suction tube | jar    |
| Crinoidea                 | Soft to medium<br>NEED: avoid that the thrusters or currents blow the sample away | Grip and pull                           | claw                            | Suction                                 | suction sampler                 | Suction off  | biobox |

### Polychaeta

| i.e.       | Condition                                                        | Detach        |       | Pick and place |                 | Store            |        |
|------------|------------------------------------------------------------------|---------------|-------|----------------|-----------------|------------------|--------|
| Polychaeta |                                                                  | ---           | ---   | Grip           | claw            | Release          | biobox |
|            | NEED: avoid that the thrusters or currents blows the sample away | Grip and pull | claw  | Suction        | suction sampler | Suction off      | biobox |
|            | ENV: on soft sediment                                            | Insert        | corer | Pull           | corer           | Release corer    | corer  |
|            |                                                                  | ---           | ---   | Grip the trap  | trap            | Release the trap | trap   |

### Porifera

| i.e.     | Condition                                                                              | Detach                                  |                         | Pick and place |                 | Store         |                  |
|----------|----------------------------------------------------------------------------------------|-----------------------------------------|-------------------------|----------------|-----------------|---------------|------------------|
| Porifera | ENV: breakable sediment<br>NEED: peduncule                                             | Push to break or Grip and pull the rock | claw                    | Grip           | claw            | Release       | biobox<br>drawer |
|          | ENV: hard sediment                                                                     | Grip the base and pull                  | claw                    | Hold           | claw            | Release       | biobox           |
|          | ENV: hard sediment<br>NEED: avoid that the thrusters or currents blows the sample away | Grip and pull                           | claw                    | Suction        | suction sampler | Suction off   | biobox           |
|          | ENV: on soft sediment                                                                  | Insert                                  | corer                   | Pull           | corer           | Release corer | corer            |
|          | SHAPE Encrusting<br>SAMPLE Fragment/Tissue                                             | Scraping                                | claw<br>suction sampler | Suction        | suction sampler | Suction tube  | jar              |
|          |                                                                                        | Scraping                                | claw                    |                |                 |               |                  |
|          | SHAPE Encrusting                                                                       | ---                                     | ---                     | Grip tissue    | claw            | Release       | biobox           |
|          |                                                                                        |                                         |                         |                |                 |               |                  |
|          |                                                                                        |                                         |                         | Grip rock      | claw            | Release       | drawer           |

### Other species

| i.e.                 | Condition                   | Detach        |                         | Pick and place |       | Store                                                                                            |                |
|----------------------|-----------------------------|---------------|-------------------------|----------------|-------|--------------------------------------------------------------------------------------------------|----------------|
| Tunicata/ Ascidiacea | CONS&DEF: very soft to soft | Grip and pull | claw (generic, liropus) | Hold           | claw  | Release, or kept in the gripper because they would have floated out of the open basket available | biobox<br>claw |
|                      |                             | Scoop         | scoop                   | Hold           | scoop | Pour                                                                                             | scoop          |
| algae                |                             | Grip and pull | claw                    | Hold           | claw  | Release                                                                                          | biobox         |
|                      |                             | Grip the rock | claw                    | Hold           | claw  | Release                                                                                          | biobox         |

|                             |                                       |               |             |               |             |                  |        |
|-----------------------------|---------------------------------------|---------------|-------------|---------------|-------------|------------------|--------|
| Hemichordata/ Enteropneusta |                                       | ---           | ---         | Grip the trap | trap        | Release the trap | trap   |
| Nemertea                    |                                       | Insert        | corer       | Pull          | corer       | Release corer    | corer  |
| Bryozoa                     | Custom tool, like a fork. SIZE: <1 mm | Scrape        | custom rake | Hold          | custom rake | Release          | basket |
| Sipuncula                   |                                       | Insert        | corer       | Pull          | corer       | Release corer    | corer  |
| <i>Thiolava veneris</i>     | Rock covered of white mat             | Grip the rock | claw        | Hold          | claw        | Release          | biobox |
| marine snow                 | Dense water                           | ?             | ?           | ?             | ?           | ?                | ?      |

Fluids and geological samples

| i.e.            | Condition                                                           | Detach                                                                              |        | Pick and place                         |        | Store               |        |
|-----------------|---------------------------------------------------------------------|-------------------------------------------------------------------------------------|--------|----------------------------------------|--------|---------------------|--------|
| fluids          |                                                                     | ---                                                                                 | ---    | Put PEGAS near the outlet and close it | PEGAS  | Release PEGAS       | drawer |
| carbonate crust | Outcropping the sea bottom, in sites where there was gas flow exits | Lever: Insert the claw in a fissure and apply low bending moment to break the piece | claw   | Grip                                   | claw   | Release             | drawer |
| rock            | Fragments of rocks already detached                                 | ---                                                                                 | ---    | Grip                                   | claw   | Release             | drawer |
| sediment        |                                                                     | Insert                                                                              | corer  | Pull                                   | corer  | Release corer       | corer  |
|                 |                                                                     | Insert Falcon tube in the sediment and move the robot                               | falcon | Lift Falcon tube                       | falcon | Release Falcon tube | falcon |
